# Supplementary material for: Association between serum retinol and overall and cause-specific mortality in a 30-year prospective cohort study
Source: PubMed Central journal article supplement (PMC8571275; doi:10.1038/s41467-021-26639-4), 2021-11-05
Supplement: 41467_2021_26639_MOESM1_ESM.pdf [file 41467_2021_26639_MOESM1_ESM.pdf]

**Association Between Serum Retinol and Overall and Cause-Specific  
Mortality in a 30-Year Prospective Cohort Study**

Huang et al.

**Supplemental Table 1.** Hazard ratios (HRs) and 95% CI for CVD mortality by quintile of serum retinol (per one SD), stratified by selected factors

|                                                                                                                                                                                                                                                  | HR (95% CI) <sup>a</sup> | P for interaction <sup>b</sup> |
|--------------------------------------------------------------------------------------------------------------------------------------------------------------------------------------------------------------------------------------------------|--------------------------|--------------------------------|
| <b>Age</b>                                                                                                                                                                                                                                       |                          |                                |
| <54 y                                                                                                                                                                                                                                            | 0.98 (0.93, 1.02)        | 0.25                           |
| 54-59 y                                                                                                                                                                                                                                          | 0.94 (0.91, 0.98)        |                                |
| ≥59 y                                                                                                                                                                                                                                            | 0.95 (0.91, 0.98)        |                                |
| <b>Cigarettes smoked/d</b>                                                                                                                                                                                                                       |                          |                                |
| <16                                                                                                                                                                                                                                              | 0.97 (0.94, 1.01)        | 0.44                           |
| 16-20                                                                                                                                                                                                                                            | 0.94 (0.90, 0.97)        |                                |
| >20                                                                                                                                                                                                                                              | 0.96 (0.92, 0.99)        |                                |
| <b>Daily ethanol consumption (g)</b>                                                                                                                                                                                                             |                          |                                |
| <5.3                                                                                                                                                                                                                                             | 0.98 (0.94, 1.02)        | 0.26                           |
| 5.3-20.4                                                                                                                                                                                                                                         | 0.94 (0.90, 0.97)        |                                |
| ≥20.4                                                                                                                                                                                                                                            | 0.94 (0.91, 0.98)        |                                |
| <b>BMI (kg/m<sup>2</sup>)</b>                                                                                                                                                                                                                    |                          |                                |
| <25                                                                                                                                                                                                                                              | 0.97 (0.93, 1.01)        | 0.21                           |
| 25-28                                                                                                                                                                                                                                            | 0.93 (0.90, 0.97)        |                                |
| ≥28                                                                                                                                                                                                                                              | 0.96 (0.92, 0.99)        |                                |
| <b>Trial intervention group</b>                                                                                                                                                                                                                  |                          |                                |
| Alpha-tocopherol                                                                                                                                                                                                                                 | 0.96 (0.93, 0.99)        | 0.74                           |
| No alpha-tocopherol                                                                                                                                                                                                                              | 0.95 (0.92, 0.98)        |                                |
| Beta-carotene                                                                                                                                                                                                                                    | 0.94 (0.91, 0.96)        | 0.020                          |
| No beta-carotene                                                                                                                                                                                                                                 | 0.97 (0.94, 1.00)        |                                |
| <b>Serum alpha-tocopherol</b>                                                                                                                                                                                                                    |                          |                                |
| Low                                                                                                                                                                                                                                              | 0.94 (0.90, 0.98)        | 0.16                           |
| Medium                                                                                                                                                                                                                                           | 0.94 (0.90, 0.98)        |                                |
| High                                                                                                                                                                                                                                             | 0.99 (0.96, 1.03)        |                                |
| <b>Serum beta-carotene</b>                                                                                                                                                                                                                       |                          |                                |
| Low                                                                                                                                                                                                                                              | 0.95 (0.92, 0.98)        | 0.36                           |
| Medium                                                                                                                                                                                                                                           | 0.95 (0.92, 0.99)        |                                |
| High                                                                                                                                                                                                                                             | 0.93 (0.90, 0.98)        |                                |
| <b>Serum total cholesterol</b>                                                                                                                                                                                                                   |                          |                                |
| Low                                                                                                                                                                                                                                              | 0.93 (0.89, 0.97)        | 0.10                           |
| Medium                                                                                                                                                                                                                                           | 0.94 (0.90, 0.97)        |                                |
| High                                                                                                                                                                                                                                             | 0.99 (0.95, 1.02)        |                                |
| <b>History of CVD at baseline</b>                                                                                                                                                                                                                |                          |                                |
| No                                                                                                                                                                                                                                               | 0.93 (0.90, 0.96)        | 0.24                           |
| Yes                                                                                                                                                                                                                                              | 0.98 (0.95, 1.01)        |                                |
| <b>Systolic and diastolic blood pressure</b>                                                                                                                                                                                                     |                          |                                |
| <130                                                                                                                                                                                                                                             | 0.93 (0.88, 0.98)        | 0.94                           |
| 130-<150                                                                                                                                                                                                                                         | 0.94 (0.91, 0.97)        |                                |
| ≥150                                                                                                                                                                                                                                             | 0.95 (0.92, 0.98)        |                                |
| <b>Diastolic blood pressure</b>                                                                                                                                                                                                                  |                          |                                |
| <80                                                                                                                                                                                                                                              | 0.92 (0.87, 0.98)        | 0.21                           |
| 80-<90                                                                                                                                                                                                                                           | 0.91 (0.88, 0.95)        |                                |
| ≥90                                                                                                                                                                                                                                              | 0.96 (0.94, 0.99)        |                                |
| <b>Years of follow-up</b>                                                                                                                                                                                                                        |                          |                                |
| 0-13 y                                                                                                                                                                                                                                           | 0.94 (0.91, 0.97)        | 0.83                           |
| 13-23 y                                                                                                                                                                                                                                          | 0.96 (0.93, 0.99)        |                                |
| ≥23 y                                                                                                                                                                                                                                            | 0.97 (0.92, 1.02)        |                                |
| Abbreviations: BMI= body mass index; CI= confidence interval; CVD= cardiovascular disease; HDL= high-density lipoprotein; SD= standard deviation                                                                                                 |                          |                                |
| <sup>a</sup> Adjusted for age, BMI, serum total and serum HDL cholesterol, cigarettes smoked per day, years of smoking, alcohol intake, intervention assignment, systolic and diastolic blood pressure, history of CVD, and history of diabetes. |                          |                                |

<sup>b</sup> *P* value for interaction: according to the likelihood test to assess the statistical significance of the cross-product term entered into the Cox proportional hazard regression model.

**Supplemental Table 2.** Hazard ratios (HRs) and 95% CI for heart disease mortality by quintile of serum retinol (per one SD), stratified by selected factors

|                                                                                                                                                                                                                                                  | <b>HR (95% CI)<sup>a</sup></b> | <b>P for interaction<sup>b</sup></b> |
|--------------------------------------------------------------------------------------------------------------------------------------------------------------------------------------------------------------------------------------------------|--------------------------------|--------------------------------------|
| <b>Age</b>                                                                                                                                                                                                                                       |                                |                                      |
| <54 y                                                                                                                                                                                                                                            | 0.97 (0.92, 1.02)              | 0.19                                 |
| 54-59 y                                                                                                                                                                                                                                          | 0.92 (0.89, 0.96)              |                                      |
| ≥59 y                                                                                                                                                                                                                                            | 0.95 (0.92, 0.99)              |                                      |
| <b>Cigarettes smoked/d</b>                                                                                                                                                                                                                       |                                |                                      |
| <16                                                                                                                                                                                                                                              | 0.96 (0.92, 1.00)              | 0.64                                 |
| 16-20                                                                                                                                                                                                                                            | 0.94 (0.90, 0.98)              |                                      |
| >20                                                                                                                                                                                                                                              | 0.95 (0.91, 0.99)              |                                      |
| <b>Daily ethanol consumption (g)</b>                                                                                                                                                                                                             |                                |                                      |
| <5.3                                                                                                                                                                                                                                             | 0.96 (0.91, 1.00)              | 0.79                                 |
| 5.3-20.4                                                                                                                                                                                                                                         | 0.93 (0.89, 0.98)              |                                      |
| ≥20.4                                                                                                                                                                                                                                            | 0.94 (0.90, 0.98)              |                                      |
| <b>BMI (kg/m<sup>2</sup>)</b>                                                                                                                                                                                                                    |                                |                                      |
| <25                                                                                                                                                                                                                                              | 0.98 (0.94, 1.02)              | 0.048                                |
| 25-28                                                                                                                                                                                                                                            | 0.91 (0.87, 0.95)              |                                      |
| ≥28                                                                                                                                                                                                                                              | 0.96 (0.92, 0.99)              |                                      |
| <b>Trial intervention group</b>                                                                                                                                                                                                                  |                                |                                      |
| Alpha-tocopherol                                                                                                                                                                                                                                 | 0.95 (0.92, 0.99)              | 0.43                                 |
| No alpha-tocopherol                                                                                                                                                                                                                              | 0.94 (0.91, 0.97)              |                                      |
| Beta-carotene                                                                                                                                                                                                                                    | 0.92 (0.89, 0.95)              | 0.0083                               |
| No beta-carotene                                                                                                                                                                                                                                 | 0.97 (0.94, 1.01)              |                                      |
| <b>Serum alpha-tocopherol</b>                                                                                                                                                                                                                    |                                |                                      |
| Low                                                                                                                                                                                                                                              | 0.93 (0.89, 0.98)              | 0.17                                 |
| Medium                                                                                                                                                                                                                                           | 0.93 (0.89, 0.97)              |                                      |
| High                                                                                                                                                                                                                                             | 0.98 (0.95, 1.02)              |                                      |
| <b>Serum beta-carotene</b>                                                                                                                                                                                                                       |                                |                                      |
| Low                                                                                                                                                                                                                                              | 0.94 (0.91, 0.98)              | 0.58                                 |
| Medium                                                                                                                                                                                                                                           | 0.94 (0.90, 0.98)              |                                      |
| High                                                                                                                                                                                                                                             | 0.93 (0.89, 0.98)              |                                      |
| <b>Serum total cholesterol</b>                                                                                                                                                                                                                   |                                |                                      |
| Low                                                                                                                                                                                                                                              | 0.93 (0.89, 0.98)              | 0.27                                 |
| Medium                                                                                                                                                                                                                                           | 0.92 (0.88, 0.96)              |                                      |
| High                                                                                                                                                                                                                                             | 0.97 (0.94, 1.01)              |                                      |
| <b>History of CVD at baseline</b>                                                                                                                                                                                                                |                                |                                      |
| No                                                                                                                                                                                                                                               | 0.90 (0.87, 0.94)              | 0.075                                |
| Yes                                                                                                                                                                                                                                              | 0.98 (0.95, 1.01)              |                                      |
| <b>Systolic and diastolic blood pressure</b>                                                                                                                                                                                                     |                                |                                      |
| <130                                                                                                                                                                                                                                             | 0.90 (0.85, 0.95)              | 0.46                                 |
| 130-<150                                                                                                                                                                                                                                         | 0.93 (0.90, 0.97)              |                                      |
| ≥150                                                                                                                                                                                                                                             | 0.96 (0.93, 1.00)              |                                      |
| <b>Diastolic blood pressure</b>                                                                                                                                                                                                                  |                                |                                      |
| <80                                                                                                                                                                                                                                              | 0.92 (0.86, 0.98)              | 0.09                                 |
| 80-<90                                                                                                                                                                                                                                           | 0.90 (0.86, 0.94)              |                                      |
| ≥90                                                                                                                                                                                                                                              | 0.97 (0.93, 1.00)              |                                      |
| <b>Years of follow-up</b>                                                                                                                                                                                                                        |                                |                                      |
| 0-13 y                                                                                                                                                                                                                                           | 0.94 (0.91, 0.98)              | 0.93                                 |
| 13-23 y                                                                                                                                                                                                                                          | 0.95 (0.91, 0.98)              |                                      |
| ≥23 y                                                                                                                                                                                                                                            | 0.95 (0.90, 1.01)              |                                      |
| Abbreviations: BMI= body mass index; CI= confidence interval; CVD= cardiovascular disease; HDL= high-density lipoprotein; SD= standard deviation                                                                                                 |                                |                                      |
| <sup>a</sup> Adjusted for age, BMI, serum total and serum HDL cholesterol, cigarettes smoked per day, years of smoking, alcohol intake, intervention assignment, systolic and diastolic blood pressure, history of CVD, and history of diabetes. |                                |                                      |

<sup>b</sup>*P* value for interaction: according to the likelihood test to assess the statistical significance of the cross-product term entered into the Cox proportional hazard regression model.

**Supplemental Table 3.** Hazard ratios (HRs) and 95% CI for respiratory disease mortality by ~~quintile of~~ serum retinol (per one SD), stratified by selected factors

|                                                                                                                                                                                                                                                  | <b>HR (95% CI)<sup>a</sup></b> | <b>P for interaction<sup>b</sup></b> |
|--------------------------------------------------------------------------------------------------------------------------------------------------------------------------------------------------------------------------------------------------|--------------------------------|--------------------------------------|
| <b>Age</b>                                                                                                                                                                                                                                       |                                |                                      |
| <54 y                                                                                                                                                                                                                                            | 0.90 (0.80, 1.01)              | 0.19                                 |
| 54-59 y                                                                                                                                                                                                                                          | 0.84 (0.77, 0.91)              |                                      |
| ≥59 y                                                                                                                                                                                                                                            | 0.91 (0.85, 0.98)              |                                      |
| <b>Cigarettes smoked/d</b>                                                                                                                                                                                                                       |                                |                                      |
| <16                                                                                                                                                                                                                                              | 0.89 (0.81, 0.98)              | 0.88                                 |
| 16-20                                                                                                                                                                                                                                            | 0.90 (0.83, 0.98)              |                                      |
| >20                                                                                                                                                                                                                                              | 0.88 (0.81, 0.95)              |                                      |
| <b>Daily ethanol consumption (g)</b>                                                                                                                                                                                                             |                                |                                      |
| <5.3                                                                                                                                                                                                                                             | 0.90 (0.82, 1.00)              | 0.67                                 |
| 5.3-20.4                                                                                                                                                                                                                                         | 0.90 (0.82, 0.98)              |                                      |
| ≥20.4                                                                                                                                                                                                                                            | 0.86 (0.79, 0.93)              |                                      |
| <b>BMI (kg/m<sup>2</sup>)</b>                                                                                                                                                                                                                    |                                |                                      |
| <25                                                                                                                                                                                                                                              | 0.92 (0.86, 0.99)              | 0.63                                 |
| 25-28                                                                                                                                                                                                                                            | 0.88 (0.80, 0.97)              |                                      |
| ≥28                                                                                                                                                                                                                                              | 0.86 (0.78, 0.96)              |                                      |
| <b>Trial intervention group</b>                                                                                                                                                                                                                  |                                |                                      |
| Alpha-tocopherol                                                                                                                                                                                                                                 | 0.87 (0.81, 0.93)              | 0.81                                 |
| No alpha-tocopherol                                                                                                                                                                                                                              | 0.89 (0.83, 0.96)              |                                      |
| Beta-carotene                                                                                                                                                                                                                                    | 0.93 (0.86, 0.99)              | 0.064                                |
| No beta-carotene                                                                                                                                                                                                                                 | 0.84 (0.78, 0.90)              |                                      |
| <b>Serum alpha-tocopherol</b>                                                                                                                                                                                                                    |                                |                                      |
| Low                                                                                                                                                                                                                                              | 0.90 (0.84, 0.97)              | 0.076                                |
| Medium                                                                                                                                                                                                                                           | 0.83 (0.76, 0.91)              |                                      |
| High                                                                                                                                                                                                                                             | 0.98 (0.89, 1.07)              |                                      |
| <b>Serum beta-carotene</b>                                                                                                                                                                                                                       |                                |                                      |
| Low                                                                                                                                                                                                                                              | 0.83 (0.77, 0.89)              | 0.43                                 |
| Medium                                                                                                                                                                                                                                           | 0.91 (0.84, 1.00)              |                                      |
| High                                                                                                                                                                                                                                             | 0.93 (0.85, 1.02)              |                                      |
| <b>Serum total cholesterol</b>                                                                                                                                                                                                                   |                                |                                      |
| Low                                                                                                                                                                                                                                              | 0.85 (0.79, 0.92)              | 0.18                                 |
| Medium                                                                                                                                                                                                                                           | 0.87 (0.80, 0.95)              |                                      |
| High                                                                                                                                                                                                                                             | 0.97 (0.88, 1.06)              |                                      |
| <b>History of CVD at baseline</b>                                                                                                                                                                                                                |                                |                                      |
| No                                                                                                                                                                                                                                               | 0.85 (0.80, 0.91)              | 0.50                                 |
| Yes                                                                                                                                                                                                                                              | 0.92 (0.85, 0.99)              |                                      |
| <b>Years of follow-up</b>                                                                                                                                                                                                                        |                                |                                      |
| 0-13 y                                                                                                                                                                                                                                           | 0.82 (0.75, 0.89)              | 0.14                                 |
| 13-23 y                                                                                                                                                                                                                                          | 0.89 (0.84, 0.96)              |                                      |
| ≥23 y                                                                                                                                                                                                                                            | 0.93 (0.84, 1.02)              |                                      |
| Abbreviations: BMI= body mass index; CI= confidence interval; CVD= cardiovascular disease; HDL= high-density lipoprotein; SD= standard deviation                                                                                                 |                                |                                      |
| <sup>a</sup> Adjusted for age, BMI, serum total and serum HDL cholesterol, cigarettes smoked per day, years of smoking, alcohol intake, intervention assignment, systolic and diastolic blood pressure, history of CVD, and history of diabetes. |                                |                                      |
| <sup>b</sup> P value for interaction: according to the likelihood test to assess the statistical significance of the cross-product term entered into the Cox proportional hazard regression model.                                               |                                |                                      |

**Supplemental Table 4.** Multivariate-adjusted hazard ratios (HRs) for overall and cause-specific mortality by quintile of serum retinol in the ATBC Study, excluding the participants who reported a history of CVD or diabetes mellitus at baseline<sup>a</sup> (We used Cox proportional hazard regression models to estimate HRs and 95% CIs. All reported P-values are 2-sided at type I error rate of 0.05. The Bonferroni correction threshold was applied to control for multiple tests (0.05/9=0.0056 [nine tests])

| Cause of death         | Serum retinol, HR (95% CI) |                    |                   |                   |                   |                                |                       |
|------------------------|----------------------------|--------------------|-------------------|-------------------|-------------------|--------------------------------|-----------------------|
|                        | Quintile 1                 | Quintile 2         | Quintile 3        | Quintile 4        | Quintile 5        | P value for trend <sup>b</sup> | Per one SD (130 µg/L) |
| Overall mortality      | 1.0                        | 0.87 (0.83, 0.92)  | 0.83 (0.79, 0.88) | 0.78 (0.74, 0.83) | 0.81 (0.76, 0.86) | <0.0001                        | 0.94 (0.92, 0.95)     |
| CVD                    | 1.0                        | 0.76 (0.69, 0.83)  | 0.77 (0.71, 0.85) | 0.70 (0.64, 0.77) | 0.72 (0.66, 0.80) | <0.0001                        | 0.92 (0.89, 0.96)     |
| Heart disease          | 1.0                        | 0.73 (0.66, 0.81)  | 0.75 (0.68, 0.83) | 0.68 (0.61, 0.75) | 0.68 (0.61, 0.76) | <0.0001                        | 0.90 (0.87, 0.93)     |
| Stroke                 | 1.0                        | 0.87 (0.71, 1.08)  | 0.88 (0.71, 1.09) | 0.83 (0.66, 1.03) | 0.94 (0.75, 1.17) | 0.57                           | 1.01 (0.94, 1.09)     |
| Cancer                 | 1.0                        | 0.99 (0.90, 1.08)  | 0.94 (0.86, 1.03) | 0.91 (0.83, 1.00) | 0.92 (0.83, 1.02) | 0.037                          | 0.97 (0.94, 1.00)     |
| Respiratory disease    | 1.0                        | 0.82 (0.70, 0.96)  | 0.77 (0.65, 0.90) | 0.71 (0.59, 0.84) | 0.60 (0.49, 0.73) | <0.0001                        | 0.85 (0.80, 0.91)     |
| Diabetes mellitus      | 1.0                        | 0.33 (0.088, 1.26) | 0.45 (0.13, 1.50) | 0.53 (0.17, 1.68) | 0.86 (0.28, 2.59) | 0.97                           | 0.98 (0.64, 1.51)     |
| Injuries and accidents | 1.0                        | 0.94 (0.75, 1.18)  | 0.72 (0.56, 0.92) | 0.88 (0.69, 1.11) | 0.92 (0.72, 1.18) | 0.52                           | 0.99 (0.91, 1.07)     |
| Other causes           | 1.0                        | 0.96 (0.82, 1.11)  | 0.85 (0.73, 1.00) | 0.74 (0.63, 0.87) | 0.90 (0.77, 1.06) | 0.045                          | 0.93 (0.88, 0.99)     |

Abbreviations: BMI= body mass index; CI= confidence interval; CVD= cardiovascular disease; HDL= high-density lipoprotein; SD= standard deviation  
<sup>a</sup> Adjusted for age, BMI, serum total and serum HDL cholesterol, cigarettes smoked per day, years of smoking, alcohol intake, intervention assignment, systolic and diastolic blood pressure. This analysis included 16,616 subjects after excluding participants who reported a history of CVD or diabetes mellitus at baseline.  
<sup>b</sup> P value for trend: based on statistical significance of the coefficient of the quintile variable (median value within each quintile).

**Supplemental Table 5.** Multivariate-adjusted hazard ratios (HRs) for overall and cause-specific mortality by quintile of serum retinol in the ATBC Study, excluding the first 5 years of follow-up <sup>a</sup> (We used Cox proportional hazard regression models to estimate HRs and 95% CIs. All reported P-values are 2-sided at type I error rate of 0.05. The Bonferroni correction threshold was applied to control for multiple tests (0.05/9=0.0056 [nine tests]))

| Cause of death                                                                                                                                                                                                                                                                                                                          | Serum retinol, HR (95% CI) |                   |                   |                   |                   |                                       |                       |
|-----------------------------------------------------------------------------------------------------------------------------------------------------------------------------------------------------------------------------------------------------------------------------------------------------------------------------------------|----------------------------|-------------------|-------------------|-------------------|-------------------|---------------------------------------|-----------------------|
|                                                                                                                                                                                                                                                                                                                                         | Quintile 1                 | Quintile 2        | Quintile 3        | Quintile 4        | Quintile 5        | <i>P</i> value for trend <sup>b</sup> | Per one SD (130 µg/L) |
| Overall mortality                                                                                                                                                                                                                                                                                                                       | 1.00                       | 0.88 (0.84, 0.91) | 0.84 (0.81, 0.88) | 0.81 (0.78, 0.85) | 0.84 (0.81, 0.88) | <0.0001                               | 0.95 (0.94, 0.97)     |
| CVD                                                                                                                                                                                                                                                                                                                                     | 1.00                       | 0.82 (0.77, 0.88) | 0.84 (0.79, 0.90) | 0.76 (0.71, 0.82) | 0.81 (0.75, 0.86) | <0.0001                               | 0.95 (0.93, 0.98)     |
| Heart disease                                                                                                                                                                                                                                                                                                                           | 1.00                       | 0.82 (0.76, 0.88) | 0.84 (0.78, 0.91) | 0.75 (0.70, 0.82) | 0.79 (0.73, 0.85) | <0.0001                               | 0.95 (0.92, 0.97)     |
| Stroke                                                                                                                                                                                                                                                                                                                                  | 1.00                       | 0.85 (0.73, 0.99) | 0.85 (0.73, 1.00) | 0.81 (0.69, 0.95) | 0.89 (0.76, 1.04) | 0.21                                  | 0.98 (0.93, 1.04)     |
| Cancer                                                                                                                                                                                                                                                                                                                                  | 1.00                       | 0.96 (0.89, 1.04) | 0.91 (0.84, 0.98) | 0.91 (0.84, 0.98) | 0.94 (0.87, 1.02) | 0.093                                 | 0.98 (0.95, 1.00)     |
| Respiratory disease                                                                                                                                                                                                                                                                                                                     | 1.00                       | 0.83 (0.73, 0.94) | 0.74 (0.64, 0.84) | 0.76 (0.66, 0.87) | 0.68 (0.58, 0.79) | <0.0001                               | 0.89 (0.84, 0.93)     |
| Diabetes mellitus                                                                                                                                                                                                                                                                                                                       | 1.00                       | 0.69 (0.36, 1.30) | 0.85 (0.47, 1.57) | 0.99 (0.56, 1.76) | 0.96 (0.53, 1.72) | 0.71                                  | 1.06 (0.87, 1.27)     |
| Injuries and accidents                                                                                                                                                                                                                                                                                                                  | 1.00                       | 0.97 (0.79, 1.19) | 0.79 (0.64, 0.98) | 0.92 (0.75, 1.13) | 0.99 (0.80, 1.21) | 0.94                                  | 1.01 (0.95, 1.08)     |
| Other causes                                                                                                                                                                                                                                                                                                                            | 1.00                       | 0.89 (0.79, 1.01) | 0.82 (0.73, 0.93) | 0.76 (0.67, 0.87) | 0.85 (0.74, 0.96) | 0.0045                                | 0.93 (0.89, 0.97)     |
| Abbreviations: BMI= body mass index; CI= confidence interval; CVD= cardiovascular disease; HDL= high-density lipoprotein; SD= standard deviation                                                                                                                                                                                        |                            |                   |                   |                   |                   |                                       |                       |
| <sup>a</sup> Adjusted for age, BMI, serum total and serum HDL cholesterol, cigarettes smoked per day, years of smoking, alcohol intake, intervention assignment, systolic and diastolic blood pressure, history of CVD, and history of diabetes. This analysis included 26,377 subjects after excluding the first 5 years of follow-up. |                            |                   |                   |                   |                   |                                       |                       |
| <sup>b</sup> <i>P</i> value for trend: based on statistical significance of the coefficient of the quintile variable (median value within each quintile).                                                                                                                                                                               |                            |                   |                   |                   |                   |                                       |                       |



**Supplemental Table 6.** Multivariate-adjusted hazard ratios (HRs) for overall and cause-specific mortality by quintile of serum retinol concentration at three years in the ATBC Study <sup>a</sup> (We used Cox proportional hazard regression models to estimate HRs and 95% CIs. All reported P-values are 2-sided at type I error rate of 0.05. Bonferroni corrected P<sub>trend</sub> value is also presented)

| Causes of mortality                   | Serum retinol (mg/L) |                   |                   |                   |                   |         | P for trend | Bonferroni corrected P for trend |
|---------------------------------------|----------------------|-------------------|-------------------|-------------------|-------------------|---------|-------------|----------------------------------|
|                                       | Quintile 1           | Quintile 2        | Quintile 3        | Quintile 4        | Quintile 5        |         |             |                                  |
| <b>All-cause</b>                      |                      |                   |                   |                   |                   |         |             |                                  |
| Deaths (n)                            | 3180                 | 3415              | 3301              | 3578              | 4196              |         |             |                                  |
| Age-adjusted HR (95% CI) <sup>b</sup> | 1.00                 | 0.89 (0.84, 0.93) | 0.85 (0.81, 0.89) | 0.84 (0.80, 0.88) | 0.90 (0.86, 0.94) | 0.0002  | 0.0018      |                                  |
| Multivariate HR (95% CI) <sup>c</sup> | 1.00                 | 0.88 (0.84, 0.93) | 0.84 (0.80, 0.89) | 0.82 (0.78, 0.86) | 0.85 (0.81, 0.89) | <0.0001 | <0.0001     |                                  |
| <b>CVD</b>                            |                      |                   |                   |                   |                   |         |             |                                  |
| Deaths (n)                            | 1209                 | 1377              | 1359              | 1473              | 1769              |         |             |                                  |
| Age-adjusted HR (95% CI) <sup>b</sup> | 1.00                 | 0.95 (0.88, 1.02) | 0.93 (0.86, 1.01) | 0.92 (0.86, 1.00) | 1.01 (0.94, 1.09) | 0.47    | 1.00        |                                  |
| Multivariate HR (95% CI) <sup>c</sup> | 1.00                 | 0.91 (0.85, 0.99) | 0.89 (0.82, 0.96) | 0.85 (0.79, 0.92) | 0.88 (0.82, 0.95) | 0.0016  | 0.01        |                                  |
| <b>Heart disease</b>                  |                      |                   |                   |                   |                   |         |             |                                  |
| Deaths (n)                            | 1000                 | 1114              | 1112              | 1202              | 1421              |         |             |                                  |
| Age-adjusted HR (95% CI) <sup>b</sup> | 1.00                 | 0.93 (0.85, 1.01) | 0.92 (0.85, 1.01) | 0.91 (0.84, 0.99) | 0.98 (0.91, 1.07) | 0.99    | 1.00        |                                  |
| Multivariate HR (95% CI) <sup>c</sup> | 1.00                 | 0.89 (0.82, 0.97) | 0.87 (0.80, 0.95) | 0.83 (0.76, 0.90) | 0.84 (0.77, 0.91) | 0.0001  | 0.0009      |                                  |
| <b>Stroke</b>                         |                      |                   |                   |                   |                   |         |             |                                  |
| Deaths (n)                            | 200                  | 258               | 244               | 264               | 338               |         |             |                                  |
| Age-adjusted HR (95% CI) <sup>b</sup> | 1.00                 | 1.07 (0.89, 1.29) | 1.01 (0.84, 1.22) | 1.00 (0.83, 1.21) | 1.18 (0.99, 1.40) | 0.091   | 0.82        |                                  |
| Multivariate HR (95% CI) <sup>c</sup> | 1.00                 | 1.07 (0.89, 1.29) | 1.02 (0.84, 1.23) | 0.99 (0.82, 1.19) | 1.12 (0.93, 1.34) | 0.35    | 1.00        |                                  |
| <b>Cancer</b>                         |                      |                   |                   |                   |                   |         |             |                                  |
| Deaths (n)                            | 1029                 | 1141              | 1088              | 1201              | 1371              |         |             |                                  |
| Age-adjusted HR (95% CI) <sup>b</sup> | 1.00                 | 0.91 (0.84, 0.99) | 0.87 (0.80, 0.94) | 0.87 (0.80, 0.95) | 0.90 (0.83, 0.98) | 0.024   | 0.22        |                                  |
| Multivariate HR (95% CI) <sup>c</sup> | 1.00                 | 0.92 (0.84, 1.00) | 0.88 (0.80, 0.95) | 0.87 (0.80, 0.95) | 0.90 (0.82, 0.97) | 0.019   | 0.17        |                                  |
| <b>Respiratory disease</b>            |                      |                   |                   |                   |                   |         |             |                                  |
| Deaths (n)                            | 391                  | 342               | 316               | 309               | 307               |         |             |                                  |
| Age-adjusted HR (95% CI) <sup>b</sup> | 1.00                 | 0.73 (0.63, 0.84) | 0.68 (0.58, 0.78) | 0.61 (0.52, 0.71) | 0.56 (0.48, 0.65) | <0.0001 | <0.0001     |                                  |
| Multivariate HR (95% CI) <sup>c</sup> | 1.00                 | 0.77 (0.67, 0.90) | 0.74 (0.64, 0.86) | 0.67 (0.57, 0.78) | 0.62 (0.53, 0.72) | <0.0001 | <0.0001     |                                  |
| <b>Diabetes mellitus</b>              |                      |                   |                   |                   |                   |         |             |                                  |

|                                                                                                                                                                                                                                                  |      |                   |                   |                   |                   |        |       |
|--------------------------------------------------------------------------------------------------------------------------------------------------------------------------------------------------------------------------------------------------|------|-------------------|-------------------|-------------------|-------------------|--------|-------|
| Deaths (n)                                                                                                                                                                                                                                       | 16   | 17                | 16                | 19                | 28                |        |       |
| Age-adjusted HR (95% CI) <sup>b</sup>                                                                                                                                                                                                            | 1.00 | 0.87 (0.44, 1.73) | 0.82 (0.41, 1.64) | 0.89 (0.46, 1.74) | 1.20 (0.65, 2.23) | 0.73   | 1.00  |
| Multivariate HR (95% CI) <sup>c</sup>                                                                                                                                                                                                            | 1.00 | 0.89 (0.45, 1.77) | 0.72 (0.36, 1.45) | 0.80 (0.41, 1.56) | 0.96 (0.51, 1.82) | 0.97   | 1.00  |
| <b>Injuries and accidents</b>                                                                                                                                                                                                                    |      |                   |                   |                   |                   |        |       |
| Deaths (n)                                                                                                                                                                                                                                       | 129  | 166               | 130               | 164               | 236               |        |       |
| Age-adjusted HR (95% CI) <sup>b</sup>                                                                                                                                                                                                            | 1.00 | 1.05 (0.83, 1.32) | 0.81 (0.63, 1.03) | 0.92 (0.73, 1.16) | 1.18 (0.95, 1.46) | 0.10   | 0.90  |
| Multivariate HR (95% CI) <sup>c</sup>                                                                                                                                                                                                            | 1.00 | 1.08 (0.85, 1.35) | 0.82 (0.64, 1.05) | 0.92 (0.73, 1.16) | 1.12 (0.89, 1.40) | 0.38   | 1.00  |
| <b>Other causes</b>                                                                                                                                                                                                                              |      |                   |                   |                   |                   |        |       |
| Deaths (n)                                                                                                                                                                                                                                       | 406  | 372               | 392               | 412               | 485               |        |       |
| Age-adjusted HR (95% CI) <sup>b</sup>                                                                                                                                                                                                            | 1.00 | 0.73 (0.64, 0.85) | 0.76 (0.66, 0.87) | 0.73 (0.64, 0.84) | 0.78 (0.68, 0.89) | 0.007  | 0.06  |
| Multivariate HR (95% CI) <sup>c</sup>                                                                                                                                                                                                            | 1.00 | 0.73 (0.64, 0.85) | 0.76 (0.66, 0.87) | 0.72 (0.62, 0.82) | 0.74 (0.64, 0.84) | 0.0004 | 0.004 |
| Abbreviations: ATBC=Alpha-Tocopherol, Beta-Carotene Cancer Prevention; BMI= body mass index; CI= confidence interval; CVD= cardiovascular disease; HDL= high-density lipoprotein                                                                 |      |                   |                   |                   |                   |        |       |
| <sup>a</sup> There were 22,312 men included in this sensitivity analysis.                                                                                                                                                                        |      |                   |                   |                   |                   |        |       |
| <sup>b</sup> Adjusted for age. <i>P</i> value for trend: based on statistical significance of the coefficient of the quintile variable (median value within each quintile).                                                                      |      |                   |                   |                   |                   |        |       |
| <sup>c</sup> Adjusted for age, BMI, serum total and serum HDL cholesterol, cigarettes smoked per day, years of smoking, alcohol intake, intervention assignment, systolic and diastolic blood pressure, history of CVD, and history of diabetes. |      |                   |                   |                   |                   |        |       |

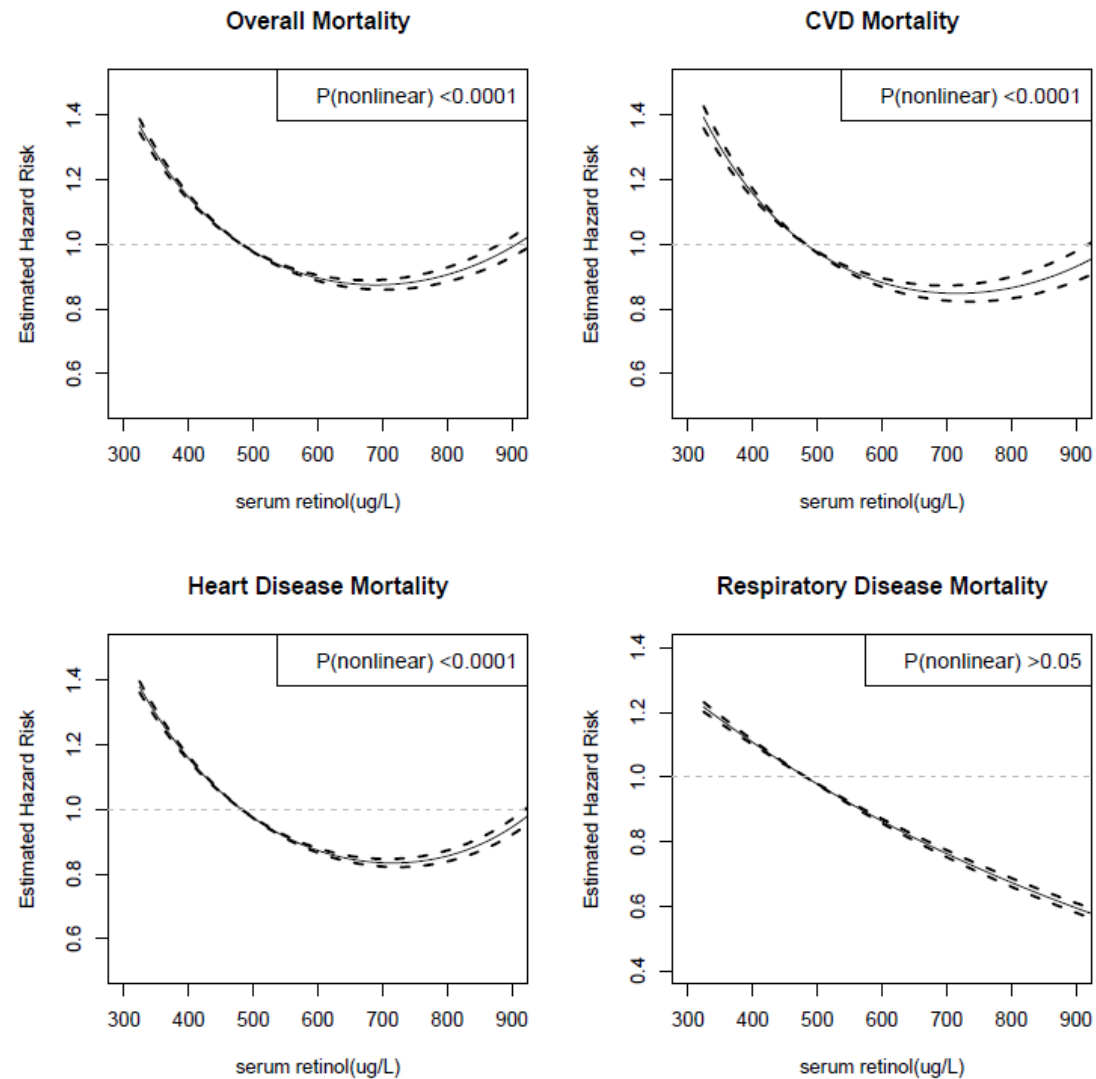

**Supplemental Figure 1.** Multivariable fractional polynomial models for the nonlinear association between serum retinol and overall and cause-specific death in the ATBC Study. The reference value (483  $\mu\text{g/L}$ ; hazard ratio = 1) corresponds to the cutoff value of the first quintile category of serum retinol concentration. A) Overall mortality. B) Cardiovascular disease (CVD) mortality. C) Heart disease mortality. D) Respiratory disease mortality. We used multivariable fractional polynomial models adjusted for age, BMI, serum total and serum HDL cholesterol, cigarettes smoked per day, years of smoking, alcohol intake, intervention assignment, systolic and diastolic blood pressure, history of CVD, and history of diabetes. All reported P-values are 2-sided at type I error rate of 0.05.

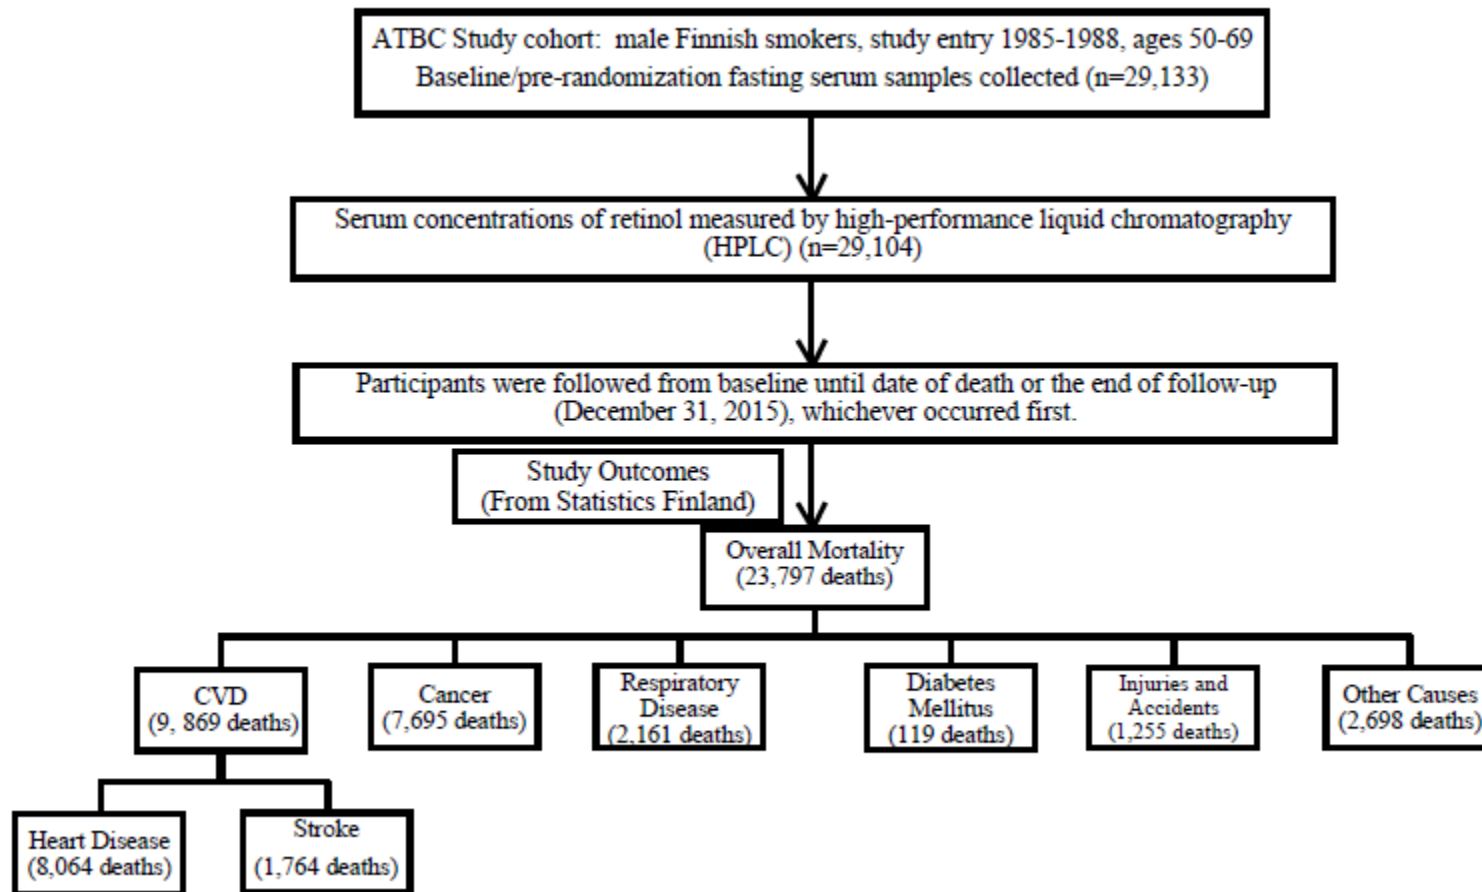

**Supplemental Figure 2.** Flow chart for study of association between serum retinol and overall and cause-specific mortality in a 30-year prospective analysis in the Alpha-Tocopherol, Beta-Carotene Cancer Prevention (ATBC) Study
